# Supplementary material for: Antimicrobial prescribing for children in China: data from point prevalence surveys in 18 tertiary centres in China in 2016–2017
Source: HighWire-hosted journal article supplement (doi:10.1136/bmjopen-2021-059244), 2022-09-01
Supplement: bmjopen-2021-059244supp002_data_supplement.pdf [file bmjopen-2021-059244supp002_data_supplement.pdf]

---

**Supplementary table 2 A list of Unrestricted, Restricted, and Special groups of antibiotics in China**

---

**Unrestricted antibiotics**

---

Cefazolin  
cefadroxil  
Metronidazole  
Clindamycin  
Azithromycin  
Erythromycin  
Clarithromycin  
Roxithromycin  
Acetylkidasamycin  
Erythromycin estolate  
Nitrofurantoin  
Amoxicillin  
Ampicillin  
Benzylpenicillin  
Penicillins  
Benzathine benzylpenicillin  
Fosfomycin  
Cefaclor  
Cefuroxime  
Ceftriaxone  
Sulfamethoxazole and trimethoprim

---

**Restricted antibiotics**

---

Amoxicillin and enzyme inhibitor  
Piperacillin and enzyme inhibitor  
Mezlocillin and sulbactam  
Ampicillin and enzyme inhibitor  
Amoxicillin clavulanic acid  
Ampicillin and Sulbactam  
Piperacillin/Tazobactam  
Chloramphenicol  
Azithromycin  
Fusidic acid  
Mezlocillin  
Piperacillin  
Cefatrizine  
Cefathiamidine  
Cefotiam  
Latamoxef  
Cefpodoxime  
Cefdinir  
Cefodizime  
Cefmenoxime

Cefixime  
Ceftazidime  
Cefoperazone  
Cefoperazone Sulbactam  
Ceftizoxime  
Cefotaxime  
Cefpiramide  
Cefetamet

---

Special group antibiotics

---

Ertapenem  
Meropenem  
Lmipenem and enzyme inhibitor (Imipenem/cilastin)  
Linezolid  
Tigecycline  
Vancomycin  
Teicoplanin  
Cefotaxime Sulbactam  
Cefepime

---

Unclassified antibiotics

---

Azidocillin  
Azlocillin  
Sulbenicillin  
Oxacillin  
Furbucillin  
Ampicloxacillin  
Fluloxacillin amoxicillin  
Cloxacillin  
Oxacillin  
Amikacin  
Tobramycin  
Netilmicin  
Sisomicin  
Neomycin  
Streptomycin  
Micronomicin  
Aztreonam  
Ornidazole  
Panipenem and betamipron  
Ticarcillin and enzyme inhibitor  
Piperacillin and Sulbactam  
Cefbuperazone  
Cefmetazole  
Cefamandole  
Cefminox

Cefoxitin  
Cefonicid  
Cefprozil  
Cefradine  
Ceftazolidime  
Cefazidime  
Cefepime  
Cefepime  
Ciprofloxacin  
Ofloxacin  
Levofloxacin  
norfloxacin  
Pipemidic acid  
Josamycin  
ErythromycinEthylsuccinate  
Lincomycin  
Polymyxin E  
Doxycycline

---
